# Supplementary material for: Synthesis and Characterization of LiFePO4–PANI Hybrid Material as Cathode for Lithium-Ion Batteries
Source: MDPI journal article supplement (doi:10.3390/ma13122834), 2020-06-24
Supplement: s1 [file s1]

# Supplementary Materials:

## Synthesis and Characterization of $\text{LiFePO}_4$ –PANI Hybrid Material as Cathode for Lithium-Ion Batteries

Cesario Ajpi <sup>1,2,\*</sup>, Naviana Leiva <sup>1</sup>, Max Vargas <sup>1</sup>, Anders Lundblad <sup>3</sup>, Göran Lindbergh <sup>2</sup> and Saul Cabrera <sup>1,\*</sup>

<sup>1</sup> Department of Inorganic Chemistry and Materials Science/Advanced Materials, IIQ Chemical Research Institute, UMSA Universidad Mayor de San Andres, La Paz, 303 Bolivia; cesario.ajpi@gmail.com (C.A.); nindeleivqmc@gmail.com (N.L.); vargmax@gmail.com (M.V.); saulcabreram@hotmail.com (S.C.)

<sup>2</sup> Department of Chemical Engineering, Applied Electrochemistry, KTH Royal Institute of Technology, SE-10044 Stockholm, Sweden; gnli@kth.se

<sup>3</sup> Division of Safety and Transport/Electronics, RISE, Research Institutes of Sweden, SE-50462 Borås, Sweden; anders.lundblad@ri.se

\* Correspondence: cesario.ajpi@gmail.com (C.A.); nindeleivqmc@gmail.com (N.L.)

## Synthesis and Structural Characterization of PANI

### Synthesis of PANI

The possible mechanism of the polymerization is shown in Figure.S1.

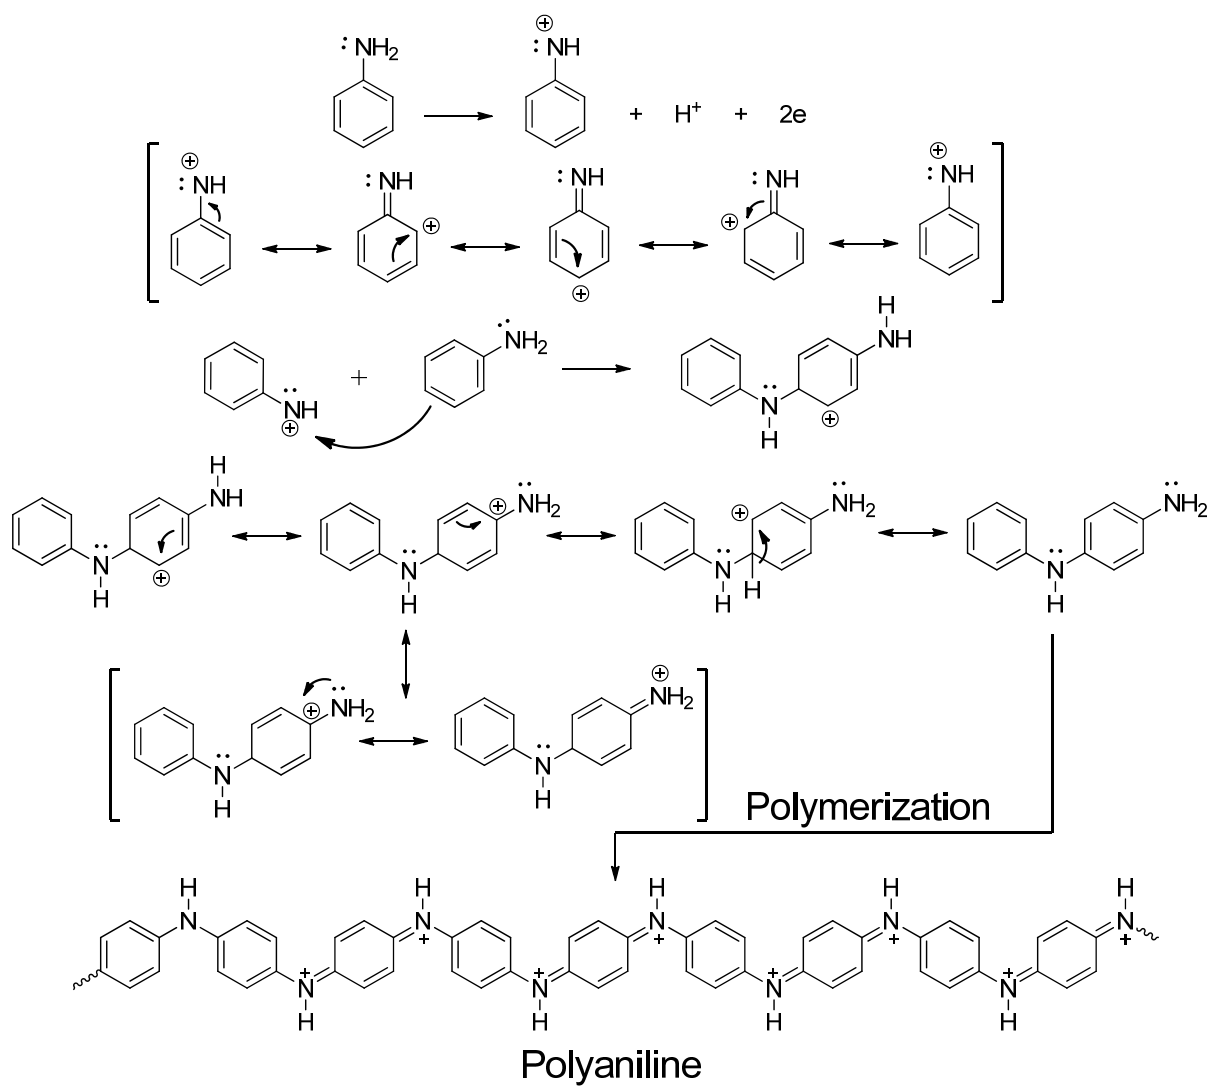

**Figure S1.** Mechanism of aniline polymerization in the synthesis PANI.

Figure S2 shows SEM images of PANI. The resulting powder of PANI synthesized by a self-assembly process has globular morphology with agglomerates of an average diameters of 2.75  $\mu\text{m}$ , conformed by primary particles of an average diameter of 310 nm, The globular morphology, characteristic of PANI synthesis by chemical oxidation is shown in Figure S3a.

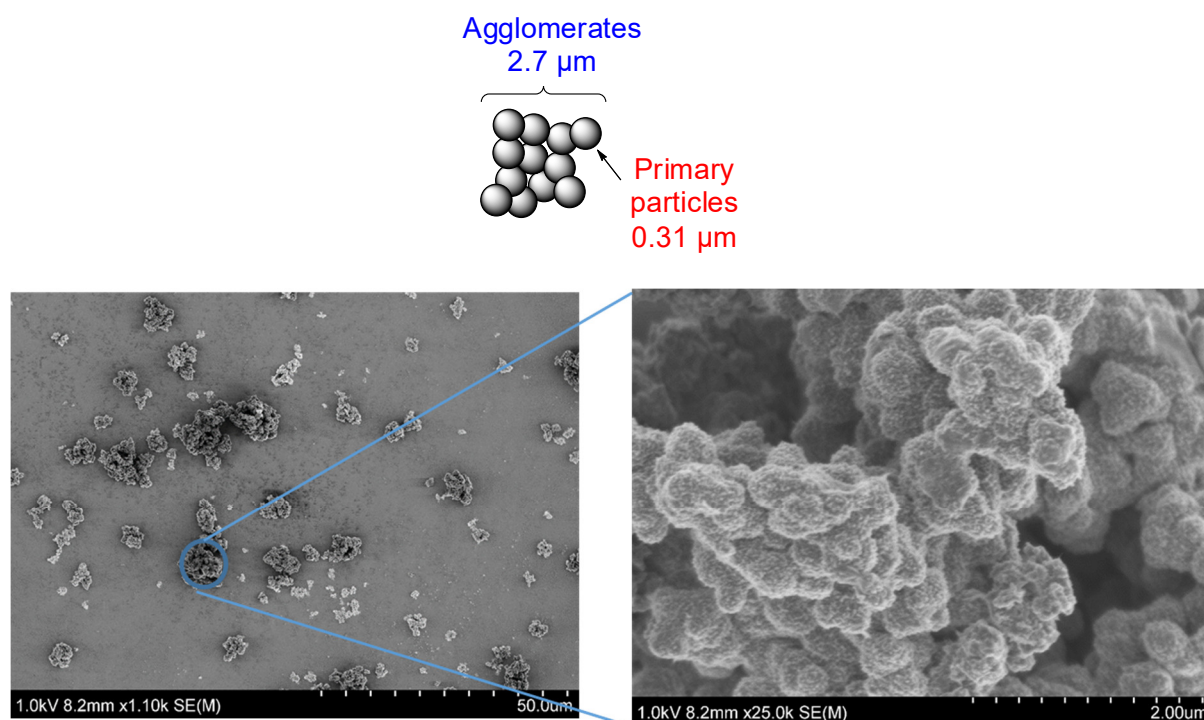

**Figure S2.** Morphology of PANI, a, upper) illustration of primary particles and agglomerates, b, lower) SEM images of the synthesized PANI agglomerates and enlargement showing the globular morphology.

The EDS depicts a characteristic composition of the PANI compound. The elemental composition is presented in Figure S3.

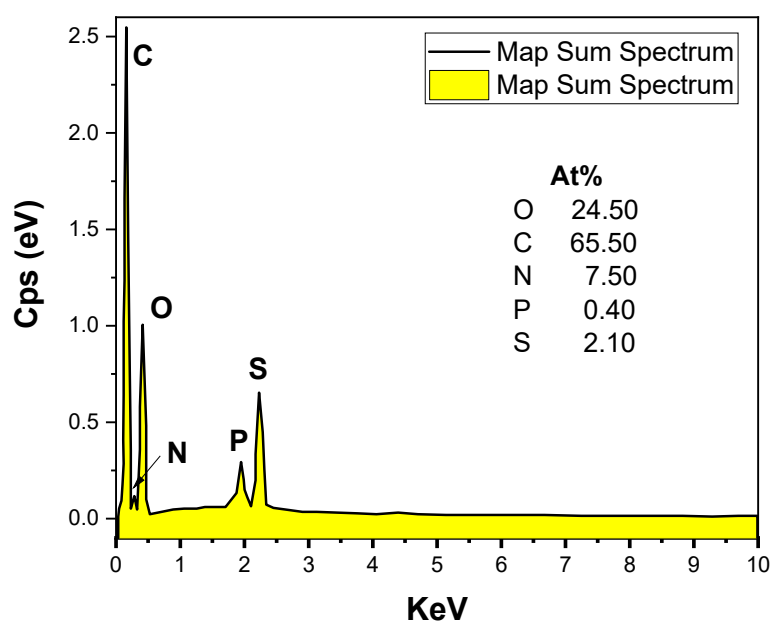

**Figure S3.** EDS spectrum of the PANI.

*FT-Infrared spectroscopy*

The peaks around  $3230\text{ cm}^{-1}$  and  $2464\text{ cm}^{-1}$ , correspond to stretching of O-H of the group  $\text{HSO}_4^-$  [1].

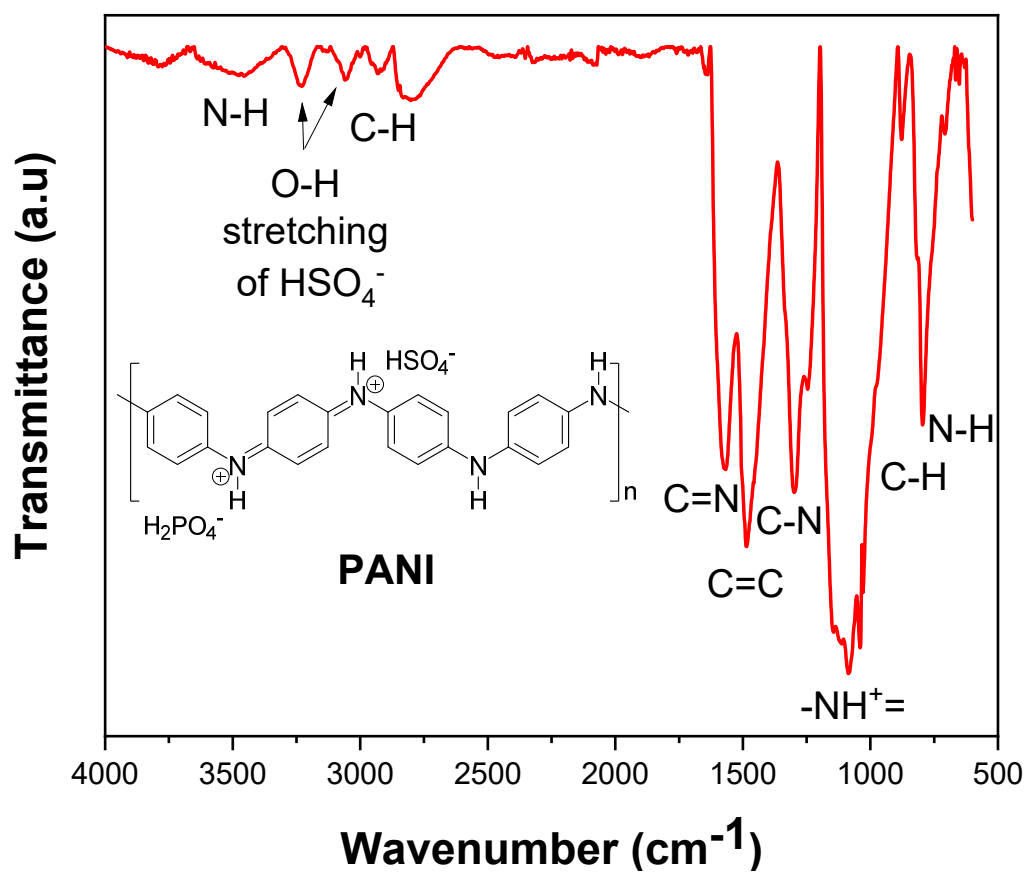

Figure S4. FTIR spectra for PANI.

A possible structure and interactions in the PANI is shown in Figure S6.

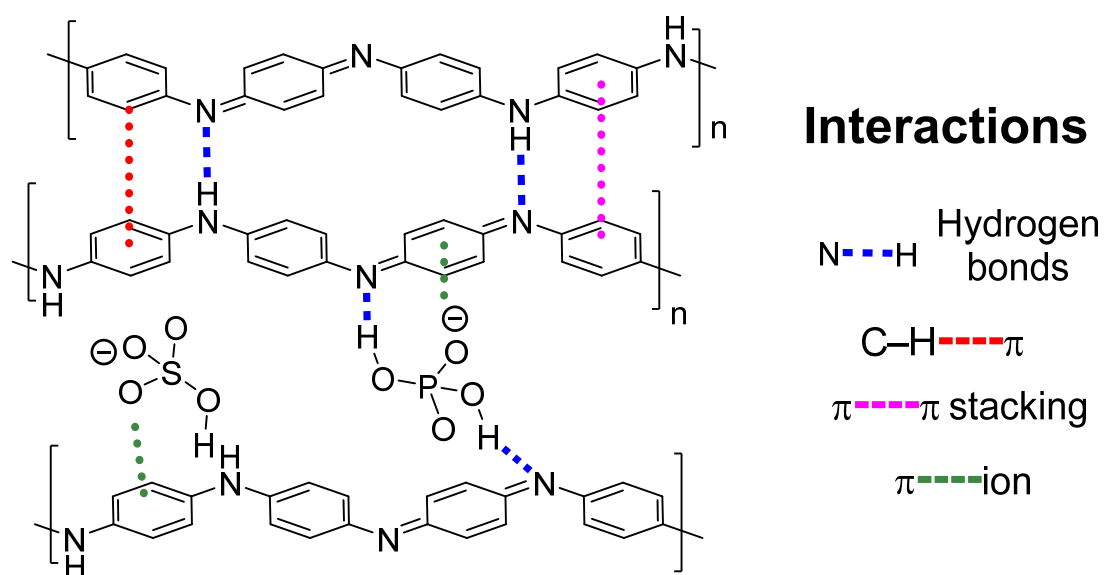

**Figure S5.** Possible structure of the PANI and its interactions.

The possible interactions present in the structure are hydrogen bonds, ion-ion, lone pair- $\pi$  and ion- $\pi$ . These interactions are weak except the hydrogen bond. The role of those interactions defines the crystallinity of the PANI and the packing of the chains in the structure.

# Thermogravimetric analysis of PANI

Figure S6 shown the possible decomposition reactions to explain the weight loss in each range of temperature.

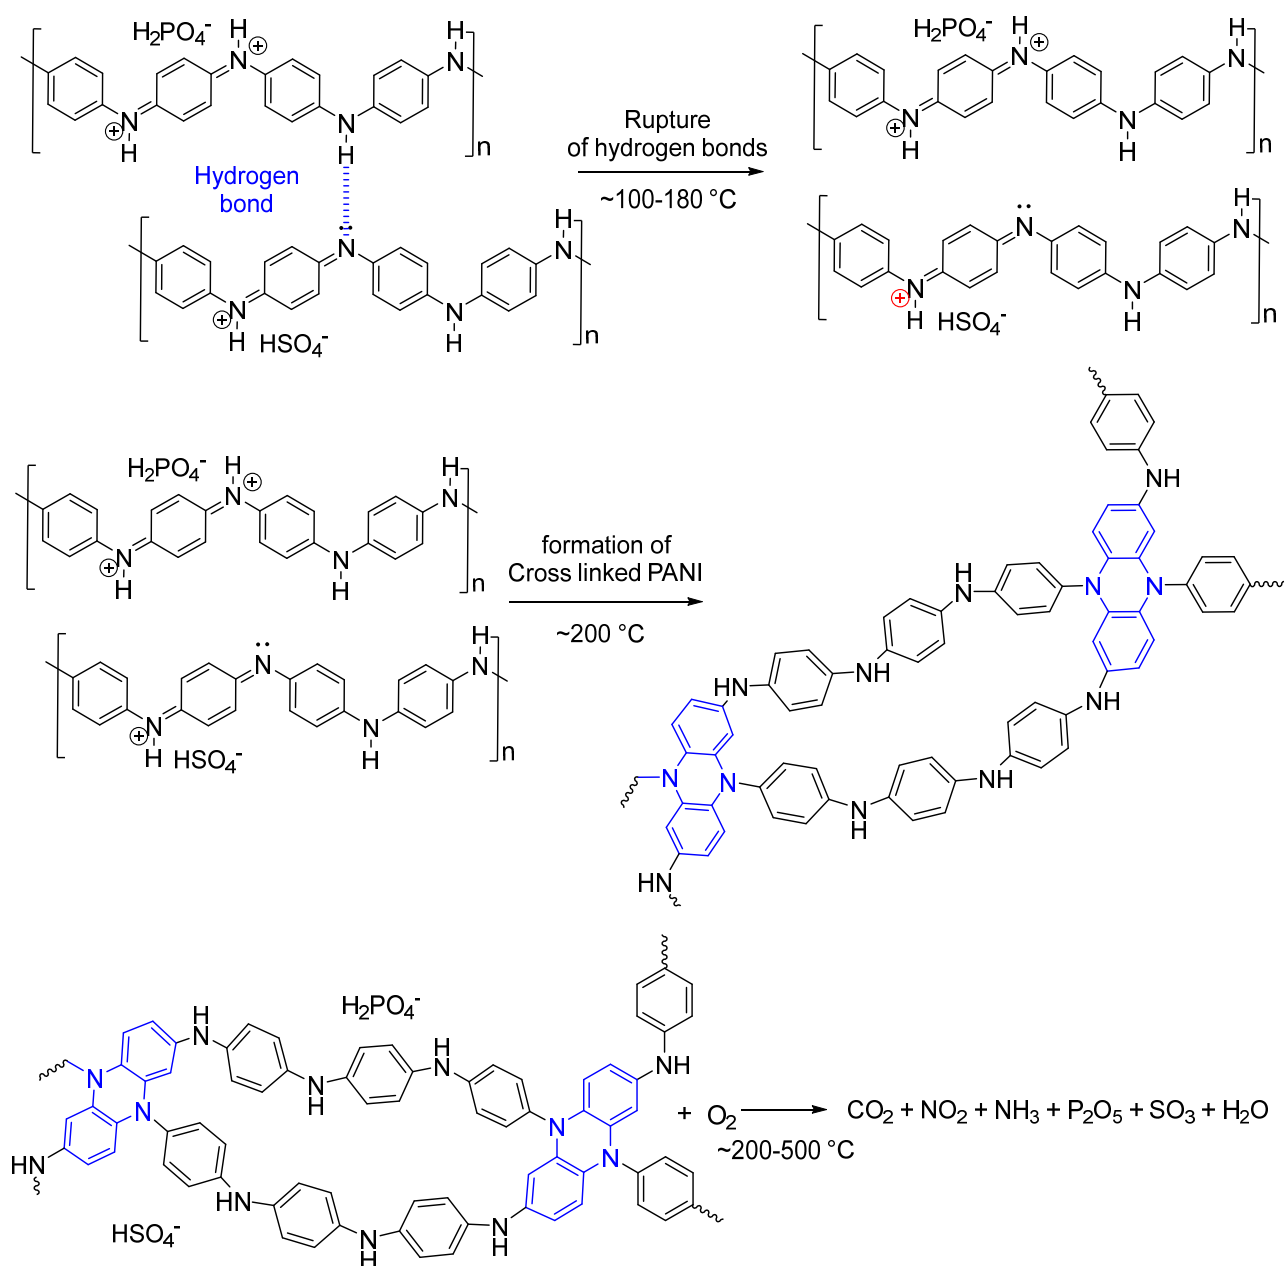

**Figure S6.** Possible qualitative reactions of the decomposition of the PANI during the TG analysis.

Figure S7 shown the possible decomposition reactions to explain the weight loss in each range of temperature.

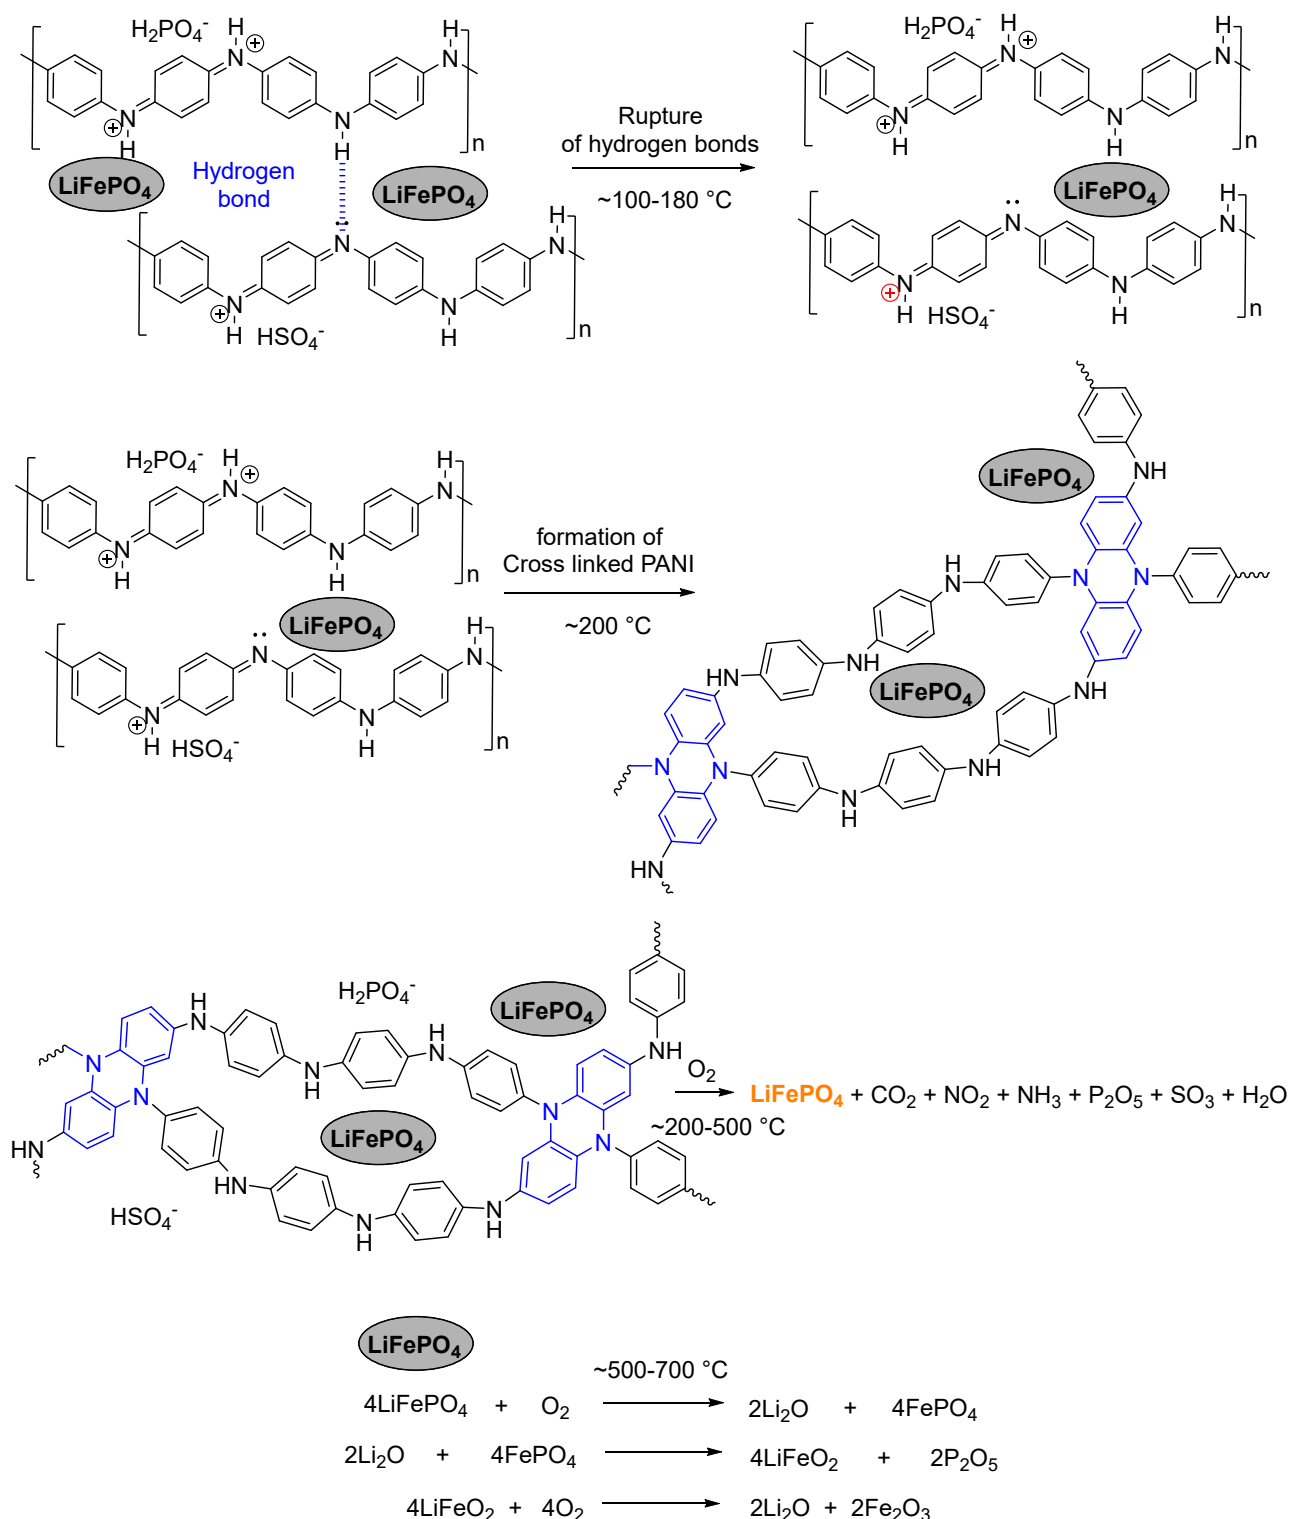

**Figure S7.** Possible qualitative reactions of the decomposition of the LiFePO<sub>4</sub>-PANI during the TG analysis.

## Electrochemical characterization of PANI

### Charge-discharge

The PANI composite was electrochemically tested in a pouch test cell by charging and discharging at room temperature over 10 cycles at a rate 0.1 C. Figure S8 show the charge-discharge capacity vs. cycle number and capacity vs. voltage. The PANI was tested in the range of 2.5–3.9 V. Figure S9 shows the charge and discharge profiles. The PANI shows a small capacity of 95 mAh g<sup>-1</sup>.

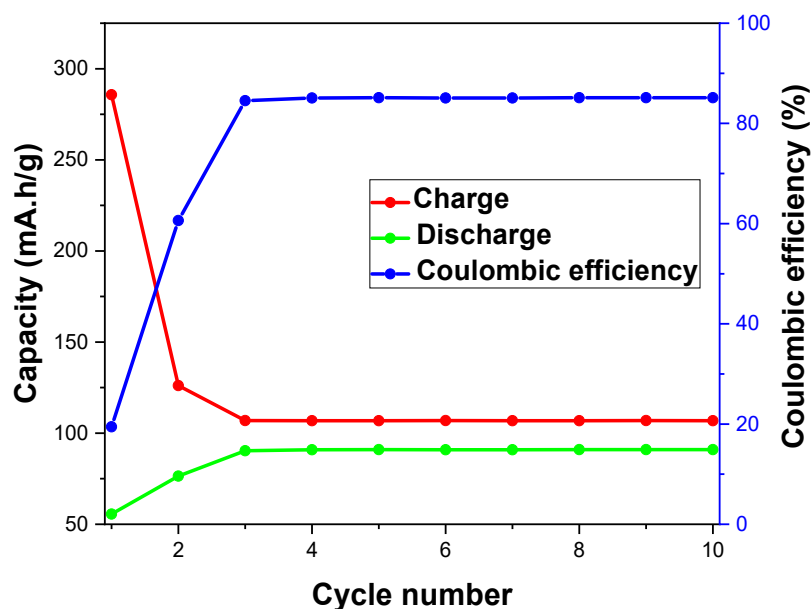

Figure S8. Electrochemical performance of PANI: cycling performance profiles.

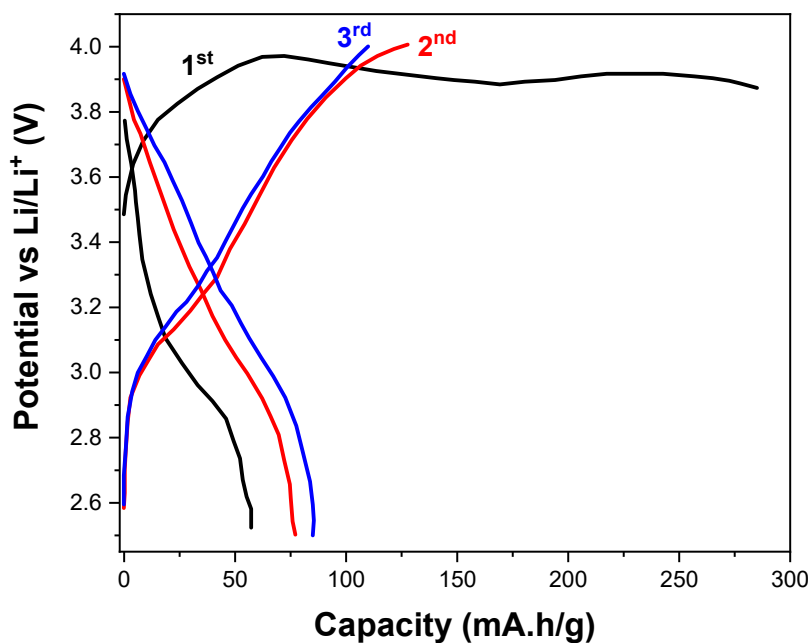

Figure S9. Electrochemical performance of PANI: galvanostatic discharge-charge profiles.



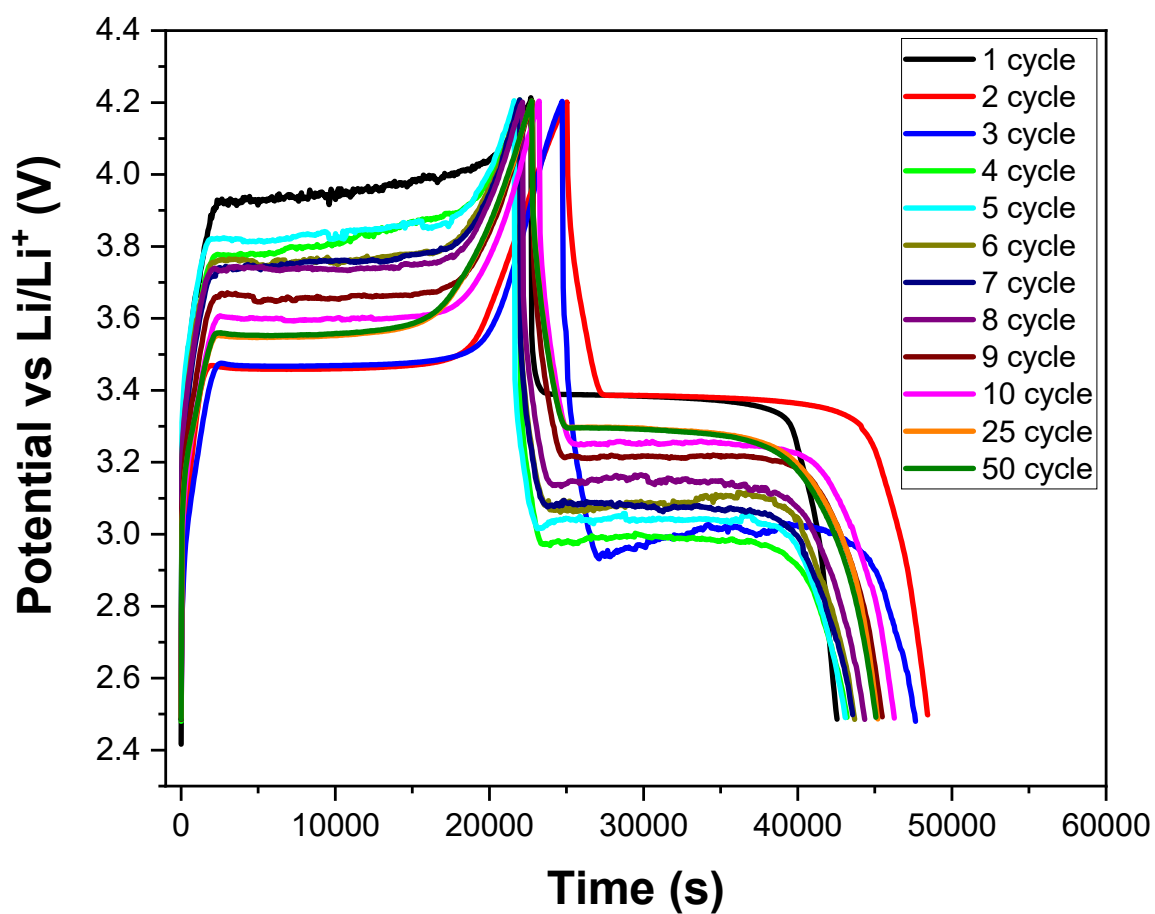

**Figure S10.** Cell voltage as a function of time at different cycles obtained by charging and discharging at same rate for the  $\text{LiFePO}_4\text{-PANI}$ . The data were obtained by charging and discharging at 0.1 C.

## References

1. Periasamy A, Muruganand S, Palaniswamy M. Vibrational studies of  $\text{Na}_2\text{SO}_4$ ,  $\text{K}_2\text{SO}_4$ ,  $\text{NaHSO}_4$  and  $\text{KHSO}_4$  crystals. *Rasayan J. Chem.* 2009, 2, 981–989.
